# Supplementary material for: Serum interferon-gamma level is associated with drug-naïve major depressive disorder
Source: PubMed Central journal article supplement — SAGE Open Med. 2020 Nov 20;8:2050312120974169. doi: 10.1177/2050312120974169 (PMC7682211; doi:10.1177/2050312120974169), 2020-11-20
Supplement: sj-pdf-1-smo-10.1177_2050312120974169.pdf [file sj-pdf-1-smo-10.1177_2050312120974169.pdf]

# Questionnaires

**Title: Serum interferon-gamma level is associated with drug-free major depressive disorder**

## 1. Identification

1.1 I.D Code: 

|  |  |  |  |  |  |  |  |  |  |  |  |  |  |  |  |  |  |  |  |
|--|--|--|--|--|--|--|--|--|--|--|--|--|--|--|--|--|--|--|--|
|  |  |  |  |  |  |  |  |  |  |  |  |  |  |  |  |  |  |  |  |
|--|--|--|--|--|--|--|--|--|--|--|--|--|--|--|--|--|--|--|--|

1.2 Name: 

|  |  |  |  |  |  |  |  |  |  |  |  |  |  |  |  |  |  |  |  |  |
|--|--|--|--|--|--|--|--|--|--|--|--|--|--|--|--|--|--|--|--|--|
|  |  |  |  |  |  |  |  |  |  |  |  |  |  |  |  |  |  |  |  |  |
|--|--|--|--|--|--|--|--|--|--|--|--|--|--|--|--|--|--|--|--|--|

1.3 Father's/ Husband's Name: 

|  |  |  |  |  |  |  |  |  |  |  |  |  |  |  |  |  |  |  |  |  |
|--|--|--|--|--|--|--|--|--|--|--|--|--|--|--|--|--|--|--|--|--|
|  |  |  |  |  |  |  |  |  |  |  |  |  |  |  |  |  |  |  |  |  |
|--|--|--|--|--|--|--|--|--|--|--|--|--|--|--|--|--|--|--|--|--|

1.4 Sex: 

|      |  |        |  |
|------|--|--------|--|
| Male |  | Female |  |
|------|--|--------|--|

 1.5 Marital Status: 

|  |  |  |  |  |  |  |  |  |  |  |  |  |  |  |  |  |  |  |  |  |
|--|--|--|--|--|--|--|--|--|--|--|--|--|--|--|--|--|--|--|--|--|
|  |  |  |  |  |  |  |  |  |  |  |  |  |  |  |  |  |  |  |  |  |
|--|--|--|--|--|--|--|--|--|--|--|--|--|--|--|--|--|--|--|--|--|

1.6 Date of Birth (dd/mm/yy): 

|  |  |  |  |  |  |  |  |  |  |  |  |  |  |  |  |  |  |  |  |  |
|--|--|--|--|--|--|--|--|--|--|--|--|--|--|--|--|--|--|--|--|--|
|  |  |  |  |  |  |  |  |  |  |  |  |  |  |  |  |  |  |  |  |  |
|--|--|--|--|--|--|--|--|--|--|--|--|--|--|--|--|--|--|--|--|--|

 1.7 Age (yr): 

|  |  |  |  |  |  |  |  |  |  |  |  |  |  |  |  |  |  |  |  |  |
|--|--|--|--|--|--|--|--|--|--|--|--|--|--|--|--|--|--|--|--|--|
|  |  |  |  |  |  |  |  |  |  |  |  |  |  |  |  |  |  |  |  |  |
|--|--|--|--|--|--|--|--|--|--|--|--|--|--|--|--|--|--|--|--|--|

1.8 Mailing address 

|  |  |  |  |  |  |  |  |  |  |  |  |  |  |  |  |  |  |  |  |  |
|--|--|--|--|--|--|--|--|--|--|--|--|--|--|--|--|--|--|--|--|--|
|  |  |  |  |  |  |  |  |  |  |  |  |  |  |  |  |  |  |  |  |  |
|  |  |  |  |  |  |  |  |  |  |  |  |  |  |  |  |  |  |  |  |  |
|  |  |  |  |  |  |  |  |  |  |  |  |  |  |  |  |  |  |  |  |  |

 Ph

1.9 Permanent address 

|  |  |  |  |  |  |  |  |  |  |  |  |  |  |  |  |  |  |  |  |  |
|--|--|--|--|--|--|--|--|--|--|--|--|--|--|--|--|--|--|--|--|--|
|  |  |  |  |  |  |  |  |  |  |  |  |  |  |  |  |  |  |  |  |  |
|  |  |  |  |  |  |  |  |  |  |  |  |  |  |  |  |  |  |  |  |  |
|  |  |  |  |  |  |  |  |  |  |  |  |  |  |  |  |  |  |  |  |  |

 Ph

1.10 Religion 

|  |  |  |  |  |  |  |  |  |  |  |  |  |  |  |  |  |  |  |  |  |
|--|--|--|--|--|--|--|--|--|--|--|--|--|--|--|--|--|--|--|--|--|
|  |  |  |  |  |  |  |  |  |  |  |  |  |  |  |  |  |  |  |  |  |
|--|--|--|--|--|--|--|--|--|--|--|--|--|--|--|--|--|--|--|--|--|

1.11 Nationality 

|  |  |  |  |  |  |  |  |  |  |  |  |  |  |  |  |  |  |  |  |  |
|--|--|--|--|--|--|--|--|--|--|--|--|--|--|--|--|--|--|--|--|--|
|  |  |  |  |  |  |  |  |  |  |  |  |  |  |  |  |  |  |  |  |  |
|--|--|--|--|--|--|--|--|--|--|--|--|--|--|--|--|--|--|--|--|--|

## 2. Personal History:

|            |                                                              |              |              |                |               |
|------------|--------------------------------------------------------------|--------------|--------------|----------------|---------------|
| <b>2.1</b> | <b>Area of residence</b>                                     | <b>Rural</b> | <b>Urban</b> | <b>S-Urban</b> | <b>Others</b> |
|            | Where have you spent your boyhood (1-15 y)?                  |              |              |                |               |
|            | Where have you spent at least ¾th or more of your life time? |              |              |                |               |

|            |                        |            |                                   |            |                               |
|------------|------------------------|------------|-----------------------------------|------------|-------------------------------|
| <b>2.2</b> | <b>Education Level</b> | <b>2.3</b> | <b>Occupation</b>                 | <b>2.4</b> | <b>Family expenses /month</b> |
|            | Illiterate             |            | Professional/Managerial /Business |            |                               |
|            | Can read only          |            | Clerical                          | <b>2.5</b> | Impression about social class |
|            | Can write a letter     |            | Technical                         |            | Rich                          |
|            | SSC or equivalent      |            | Skilled worker                    |            | Upper Middle                  |
|            | HSC or equivalent      |            | Unemployed/ Pensioner             |            | Lower Middle                  |
|            | Graduate or higher     |            | Housewife                         |            | Poor                          |
|            | Other                  |            | Others                            |            | Destitute                     |

|            |                      |             |                       |
|------------|----------------------|-------------|-----------------------|
| <b>2.3</b> | <b>Smoking Habit</b> | <b>2.7a</b> | <b>Current smoker</b> |
|            | Never                |             | Sticks/ Day           |
|            | Ex-smoker > 6 months | <b>2.7b</b> | <b>Ex-smoker</b>      |
|            | Current smoker       |             | Sticks /day           |

3. Previous history of psychiatric disorder:  Y  N

4. Family history of psychiatric disorder:  Y  N

5. Case:  New  Old

**6. Biological Characteristics:**

6.1 Height (cm): 6.2 Weight (kg):

6.3 Pulse/min: 6.4 Temperature:

**7. Diagnostic criteria for major depressive disorder:**

DSM-IV diagnostic criteria for major depressive disorder are as follows: Depressed mood or a loss of interest or pleasure in daily activities for more than two weeks. Mood represents a change from the person's baseline. Impaired function: social, occupational, educational. Specific symptoms, at least 5 of these 9, present nearly every day:

| <b>DSM-5 CRITERIA</b>                                                 | <b>Yes</b> | <b>No</b> |
|-----------------------------------------------------------------------|------------|-----------|
| Depressed mood or irritable most of the day, nearly every day         |            |           |
| Decreased interest or pleasure in most activities, most of days       |            |           |
| Significant weight change (5%) or change in appetite                  |            |           |
| Change in sleep: Insomnia or hypersomnia                              |            |           |
| Change in activity: Psychomotor agitation or retardation              |            |           |
| Fatigue or loss of energy                                             |            |           |
| Guilt/worthlessness: Feelings of worthlessness or inappropriate guilt |            |           |
| Concentration: diminished ability to think or concentrate             |            |           |
| Suicidality: Thoughts of death or suicide, or has suicide plan        |            |           |

**Principal investigator**

Name:

Signature:

Date:
